# Supplementary material
Source: PubMed Central journal article supplement (PMC2974021)
Supplement: NIHMS243161-supplement-01.pdf [file NIHMS243161-supplement-01.pdf]

Supplementary Information for

**The role of alanine 163 in solute permeability of  
*Leishmania major* aquaglyceroporin LmAQP1**

Rita Mukhopadhyay, Goutam Mandal, Venkata Subba Rao Atluri, Katherine Figarella,  
Nestor L. Uzcategui, Yao Zhou, Eric Beitz, A. Abdul Ajees, Hiranmoy Bhattacharjee

```

GlpF      1  -----
hAQP9     1  -----M
PfaQP     1  -----
TbaQP2    1  MQSQPDNV-AYPELQA----VNKDGTVQGNVDNSSNERWDADVQKHEV-----A
TbaQP3    1  MQSQPDNV-AYPELQA----VNKDGTVQGN-DDSSN-----RKHEV-----A
TbaQP1    1  MSDEKINVHQYPSEADVRLKARNGGACEVPEENNEPIPN-RSANPQEKNELELVGDNA
LmAQP1    1  MHEEEDQ-----HES-----

GlpF      1  -----MSQTSTLKGQCIAEFLGTGLLIFFGVGCVAALKVAGA-----SFG
hAQP9     2  QPEGAEEKGKSFKQRLVLKSSLAKEITLSEFLGTFFILIVLGGCVQAAILSRG-----RFG
PfaQP     1  -----MHMLFYKSYVREFIGEFLGTFFVLMFLGECATANFHTTG-----LSG
TbaQP2    50  EAQEKPVGGINFWAPRELRLNRYDYVAEFLGNFVLIYIAKCAVITSLVLP-----DF
TbaQP3    42  EAQEKPVGGINFWAPRELRLNRYDYMGETLLGTFFVLLFMGNQVAVTVIDG-----KL
TbaQP1    60  DNEAHDADVNYWAPRQLRLDYRNYMGEFLGTFFVLLFMGNQVAVTVIDK-----DL
LmAQP1    12  ---KRNFMSONRWPLYRYRWRLREYVAEFFGTFFLVTFGTGVAVTTFVHGTTAMYQSNS

GlpF      41  -QWEISVIVWGLGVAMAIYLTAGVSGAHLNPAVTIALWLFACFDKRKVIPIVFSQVAGAFV
hAQP9     56  GVITINVGFSMAVAMAIYVAGGVSGHINPAVSLAMCLFCRMKWEKLPFYVGAQFLGAFV
PfaQP     42  DWYKLCIGWGLAVFFGILVSAKLSGAHLNLAVSIGLSSINKFDLKKIPVYFFAQLLGAFL
TbaQP2    102  GLLGLTIGTICVAVTMALYVSLGISGSHLNSAVTVGNAVFGDFPWRKVPGYIAAQMGLTFL
TbaQP3    94  GFLSITLWGLIAVTMALYVSLGISGSHLNPVTVGNAVFGDFPWRKVPGYIAAQMGLGAFV
TbaQP1    112  GFLSITLWGLIAVTMGLYISLGISGSHLNPVTLANAVFGDFPWRKVPGYIAAQMGLGAFV
LmAQP1    69  SYLAITFGWAFGLAISLFLSMAVSGHNLNPAVTLANCVFGTFPWVKLPGYFLAQLGGFV

GlpF      100  AAALVYGLYYNLFFDFEQTHHIVRCVSVESVDLAGTFSTYPNPHINFVQAFVEMVITAIL
hAQP9     116  GAATVFGLYYDGLMSFAGGKLLIVG---ENATAHIFATYPAPYLSLANAFADQVVATMIL
PfaQP     102  GTSTVYGLYHGFISNSK-----IPQFAWETSRNPSISLTGAFNFELILTGLL
TbaQP2    162  GAACAYGVFADLLKAHGGGELIATFG--EKG-IAWVFAMYPAEGNGIFYPPIFAELISTAVL
TbaQP3    154  GAACAYGVFADLLKAHGGGELIATFG--EKG-TAGVFSYPRDSNGLFSCIFGFEICTAML
TbaQP1    172  GAACAYGVFADLLKQHS GG-LVGF--DKG-FAGMFSTYPRGNRIFYCIFSEFICTAIL
LmAQP1    129  GAANTYVLEKSHFDEAEKRLILNET--MASKYCGIFATYPNVAN--TYAVWSEVFNIMAL

GlpF      160  MGLILAITDDGN-GVPRGPLAPLILIGLLIIVIGASMGPLTGFAMNPARDFGPKVFAWLAG
hAQP9     173  LIIVFAIFDSRNLGAPRG-LEPIAIGLLIIVIASLGLNSGCAMNPARDLSPRLFTALAG
PfaQP     149  LLVILVVDENICGKFHILKSSVGLIILCIGITFGNITGFALNPSRDLSRFLSLIATA
TbaQP2    219  LLCVCGIFDPNN--SPAKGYETVALCALVFMVNNFGLASPLANNPSLDFGPRVFGAILL
TbaQP3    211  LFCVCGIFDPNN--SPAKGHEPLAVCALVFAIGNNIGYSTGYAINPARDFGPRVFSFLL
TbaQP1    228  LFCVCGIFDPNN--SPAKGHEPLAVCALVFAIGNNIGYASGYAINPARDFGPRVFSAILL
LmAQP1    185  MMGILAITDARM--TPAVDYKPVVAILLGVIGIASGINSYGLNPARDLSPRILSAML

GlpF      219  WGNVAFICGRDIPYFLVPLFGPIVGAIVGAFAYRKLIGRHLP-CDICVVEEKETTTTPEQ
hAQP9     232  WGFVFRAGN--NFWWIPVVGPLVGAIVGGLIYVLVIEIHHPEPDSVFKTEQSEDKPEKY
PfaQP     208  YGKDTFTKDN--FYFWVPLVAPCVSIVFVCQFYDKVIC---PLVDLANNEKDGVDL----
TbaQP2    276  LGGEVFSHAN--YYFWVPLVVPFFGAILGLFLYKYFLPH-----
TbaQP3    268  YGGEVFSHAN--YYFWVPLVPLFGGIFGLFLYKYFVPH-----
TbaQP1    285  FGSEVFTTGN--YYFWVPLFIPFTGGIFGLFLYKYFVVPY-----
LmAQP1    242  WGESEFTLHS--YYFWIPLVVPFVGALFCMFLYVFFIIPPSC-----

GlpF      278  KASL--
hAQP9     290  ELSVIM
PfaQP     -----
TbaQP2    -----
TbaQP3    -----
TbaQP1    -----
LmAQP1    -----

```

**Fig. S1. Comparison of amino acid sequence of *E. coli*, human, and protozoan aquaglyceroporins.** Abbreviations: H, *Homo sapiens*; Lm, *Leishmania major*; Pf, *Plasmodium*

*falciparum*; Tb, *Trypanosoma brucei*. The protein source and GenBank accession numbers of the aligned sequences are *E. coli* GlpF (1FX8\_A); hAQP9 (NP\_066190); PfAQP (3C02\_A); TbAQP1 (CAG27020); TbAQP2 (CAG27021); TbAQP3 (CAG27022); and LmAQP1 (AAS73184). Multiple sequence alignments was performed with ClustalW and shading by BOXSHADE. The dashes indicate the gaps introduced to maximize sequence alignment. The black and grey regions indicate sequence identity and sequence similarity, respectively.

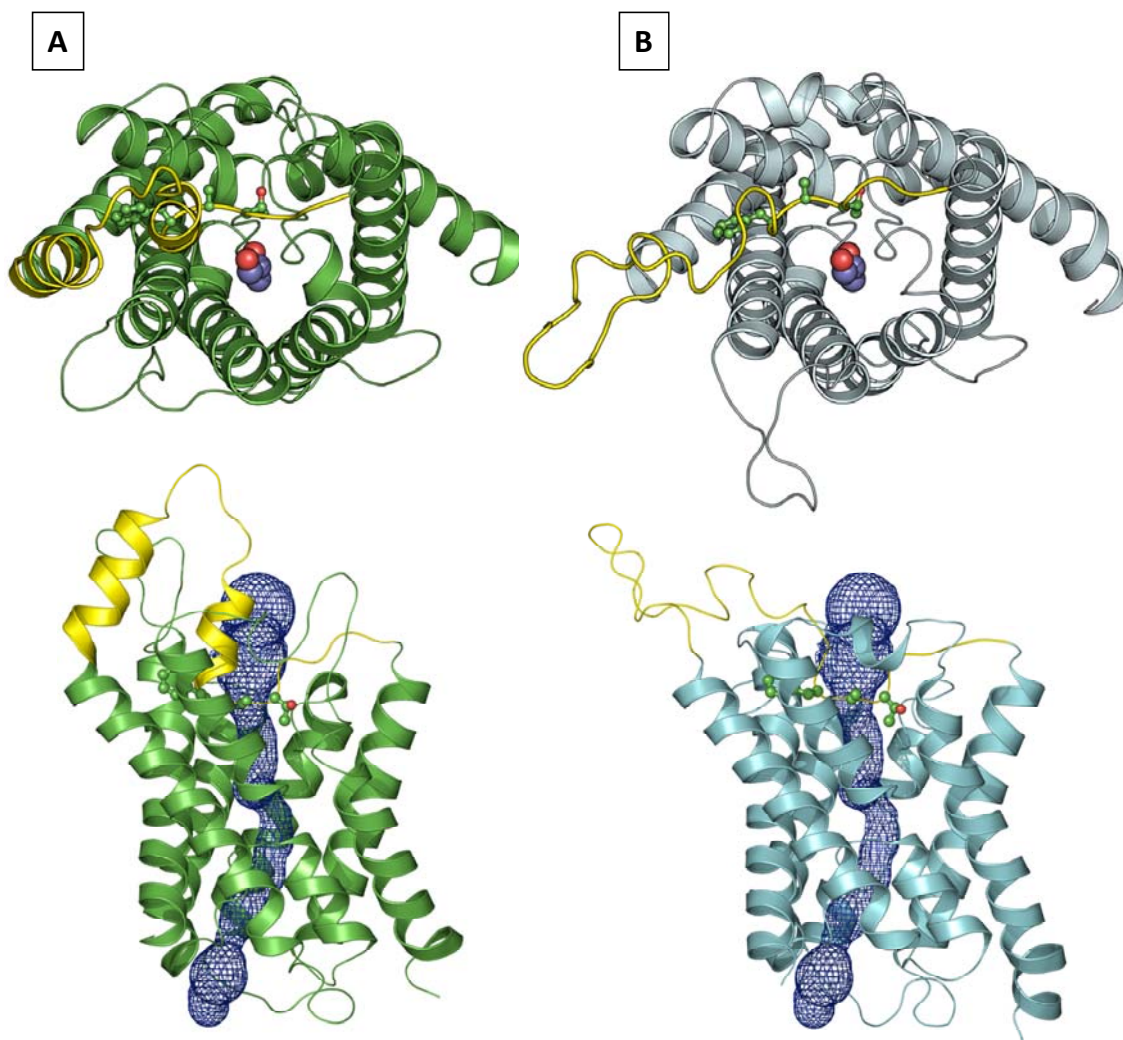

**Fig. S2. Molecular modeling of LmAQP1 based on the crystal structures of GlpF and PfAQP.**

A. Ribbon representation of a model of LmAQP1 monomer (green) based on the structure of GlpF (PDB ID: 1LDF). *Top*, viewed from the periplasmic side, and *Bottom*, viewed parallel to the membrane. B. Ribbon representation of a model of LmAQP1 monomer (cyan) based on the structure of PfAQP (PDB ID: 3C02). *Top*, viewed from the periplasmic side, and *Bottom*, viewed parallel to the membrane. The C-loop is highlighted in yellow and the amino acid triad Phe<sub>162</sub>-Ala<sub>163</sub>-Thr<sub>164</sub> is shown as ball and stick model with the carbon and oxygen atoms colored as green and red, respectively. A glycerol molecule is shown at the centre of the channel as a spherical model with the oxygen and carbon atoms colored as red and magenta, respectively. The channel is depicted as blue mesh.

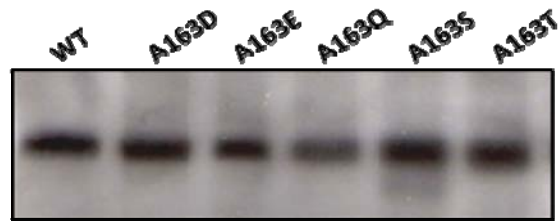

**Fig. S3. Expression and localization of wild-type and altered LmAQP1 in *L. donovani* promastigotes.** Western blot analysis of flagellar membrane fractions of *L. donovani* promastigotes expressing wild type and altered LmAQP1 were probed with the LmAQP1 antipeptide antibody as described in Materials and Methods.

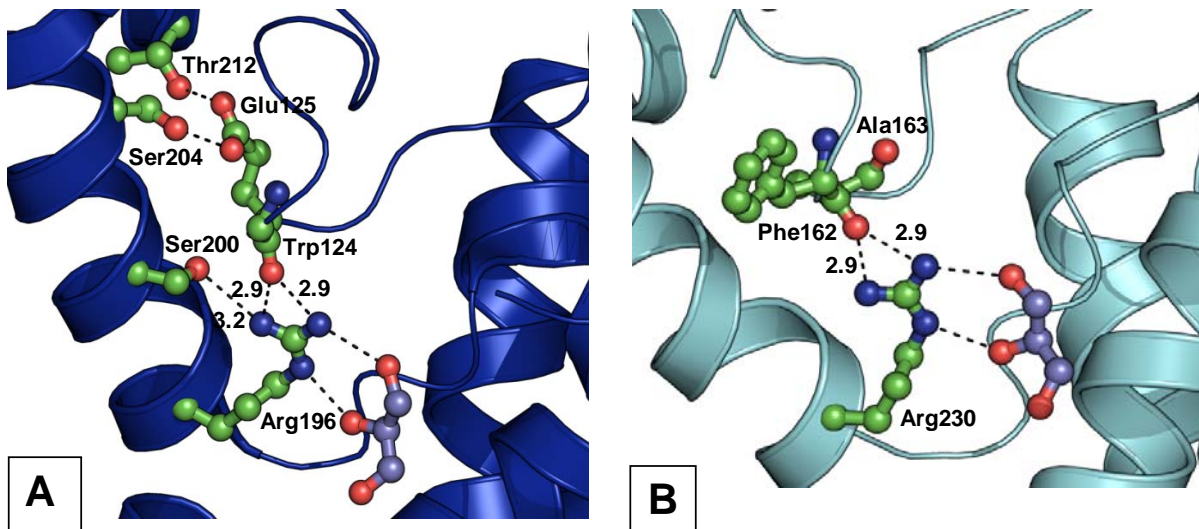

**Fig. S4. Selectivity filter region site of LmAQP1 modeled on PfaQP.** Ribbon representations of the active site of (A) PfaQP (blue); (B) LmAQP1 based on PfaQP (cyan). Residues involved in the selectivity filter of the channel are shown as ball-and-stick model with the carbon, oxygen, and nitrogen atoms colored as green, red, and blue, respectively. Glycerol is drawn as ball-and-stick model with the carbon and oxygen colored as magenta and red, respectively. The hydrogen bond network around the arginine residue is shown as dotted lines with measurements in angstroms. Transmembrane helices 1, 4, and 8 have been removed for improving the clarity of the selectivity filter region.
